# Supplementary material
Source: PubMed Central journal article supplement (PMC8554690)

## Supplementary Online Content

Cramer JD, Grauer J, Sukari A, Nagasaka M. Incidence of second primary lung cancer after low-dose computed tomography vs chest radiography screening in survivors of head and neck cancer: a secondary analysis of a randomized clinical trial. *JAMA Otolaryngol Head Neck Surg*. Published online October 28, 2021. doi:10.1001/jamaoto.2021.2776

**eFigure.** Flow Diagram of Cohort Selection

This supplementary material has been provided by the authors to give readers additional information about their work.

**eFigure.** Flow Diagram of Cohort Selection

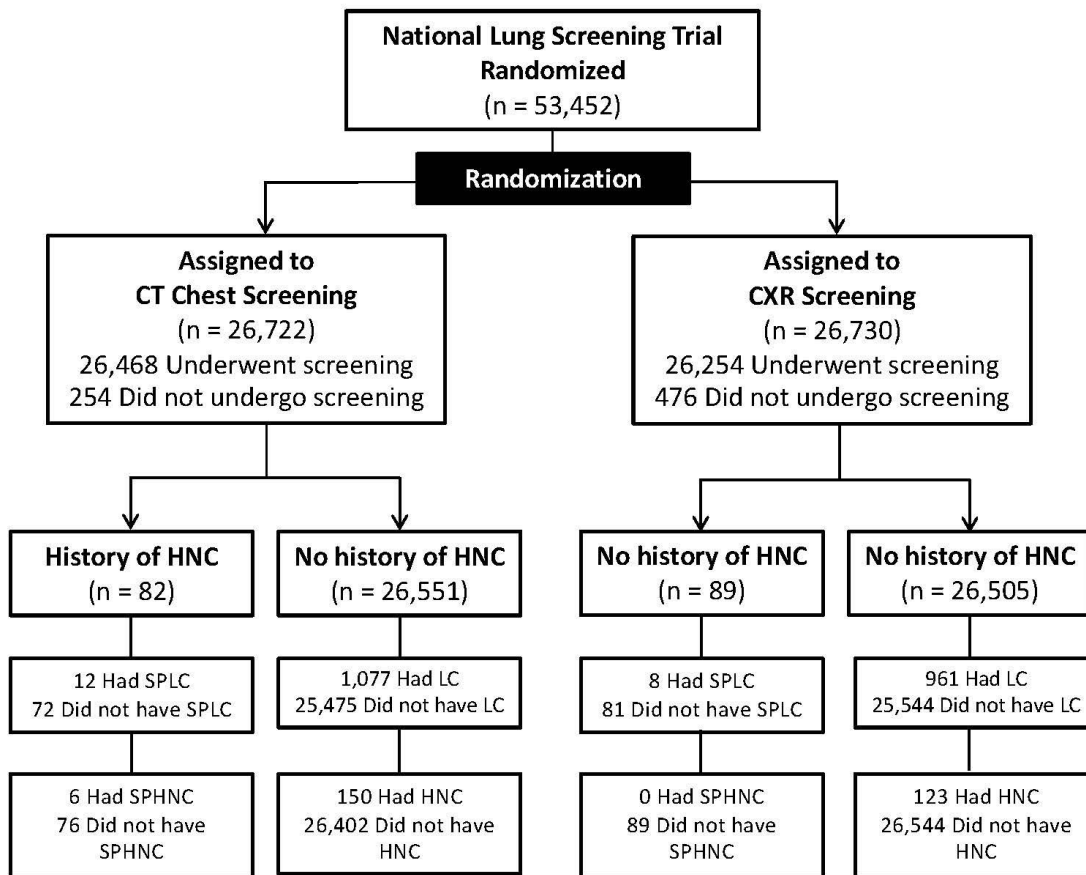

Supplement: jamaotolaryngolheadnecksurg-e212776-s002.pdf [file jamaotolaryngolheadnecksurg-e212776-s002.pdf]
