# Supplementary material
Source: PubMed Central journal article supplement (PMC8554690)
Supplement: jamaotolaryngolheadnecksurg-e212776-s003.pdf [file jamaotolaryngolheadnecksurg-e212776-s003.pdf]

## Data Sharing Statement

Cramer. Incidence of Second Primary Lung Cancer After Low-Dose Computed Tomography vs Chest Radiography Screening in Survivors of Head and Neck Cancer. *JAMA Otolaryngol Head Neck Surg*. Published October 28, 2021. doi:10.1001/jamaoto.2021.2776

### Data

**Data available:** Yes

**Data types:** Deidentified participant data, Participant data with identifiers, Data dictionary

**How to access data:** <https://cdas.cancer.gov/nlst/>

**When available:** With publication

### Supporting Documents

**Document types:** None

### Additional Information

**Who can access the data:** Researchers with approved projects to use the National Lung Screening Trial

**Types of analyses:** For any purpose

**Mechanisms of data availability:** Researchers can submit projects to access the data at <https://cdas.cancer.gov/nlst/>
